# Supplementary material for: Clinical Characteristics and Outcomes of Colorectal Cancer in the ColoCare Study: Differences by Age of Onset
Source: MDPI journal article supplement (doi:10.3390/cancers13153817), 2021-07-29
Supplement: s1 [file s1]

## Supplementary Data

**Supplementary Table S1.** Logistic regression OR (95% confidence interval) comparing tumor, clinical, and behavioral characteristics between early- ( $\leq 50$  years), intermediate (50-55 years), and late-onset ( $\geq 55$  years) colorectal cancer patients.

| Exposure variable                          |               | Age of onset |                     |                    |                     |            |            |
|--------------------------------------------|---------------|--------------|---------------------|--------------------|---------------------|------------|------------|
|                                            |               | Early-Onset  |                     | Intermediate onset |                     | Late-onset |            |
|                                            |               | N            | OR (95%CI)          | N                  | OR (95%CI)          | N          | OR (95%CI) |
| Neoadjuvant treatment (rectal cancer only) | No            | 134          | REF                 | 98                 | REF                 | 623        | REF        |
|                                            | Yes           | 319          | 2.55<br>(1.65-3.94) | 98                 | 1.24<br>(0.81-1.90) | 426        | REF        |
| Adjuvant treatment                         | No            | 94           | REF                 | 72                 | REF                 | 505        | REF        |
|                                            | Yes           | 232          | 2.17<br>(1.61-2.85) | 130                | 1.54<br>(1.15-2.05) | 574        | REF        |
| Stage at diagnosis                         | 0             | 7            | 0.91<br>(0.38-2.18) | 10                 | 1.30<br>(0.60-2.82) | 51         | REF        |
|                                            | I             | 50           | REF                 | 43                 | REF                 | 279        | REF        |
|                                            | II            | 93           | 1.44<br>(0.97-2.15) | 55                 | 0.99<br>(0.65-1.57) | 381        | REF        |
|                                            | III           | 185          | 2.06<br>(1.42-2.99) | 98                 | 1.22<br>(0.82-1.81) | 499        | REF        |
|                                            | IV            | 107          | 2.79<br>(1.86-4.18) | 60                 | 1.79<br>(1.16-2.78) | 231        | REF        |
|                                            |               |              |                     |                    |                     |            |            |
| Smoking                                    | Ever          | 159          | REF                 | 110                | REF                 | 736        | REF        |
|                                            | Never         | 207          | 1.74<br>(1.37-2.22) | 130                | 1.54<br>(1.19-2.01) | 549        | REF        |
| BMI                                        | Underweight   | 62           | 0.98<br>(0.47-2.03) | 16                 | --                  | 79         | REF        |
|                                            | Normal weight | 142          | REF                 | 76                 | REF                 | 358        | REF        |
|                                            | Overweight    | 116          | 0.54<br>(0.40-0.71) | 84                 | 0.66<br>(0.48-0.90) | 533        | REF        |
|                                            | Obese         | 128          | 0.69<br>(0.52-0.91) | 95                 | 0.83<br>(0.61-1.14) | 466        | REF        |

mutually adjusted for sex, race.
